# Supplementary material
Source: ML conference proceedings conference paper supplement (https://proceedings.neurips.cc/paper_files/paper/2019/hash/aceacd5df18526f1d96ee1b9714e95eb-Abstract.html)

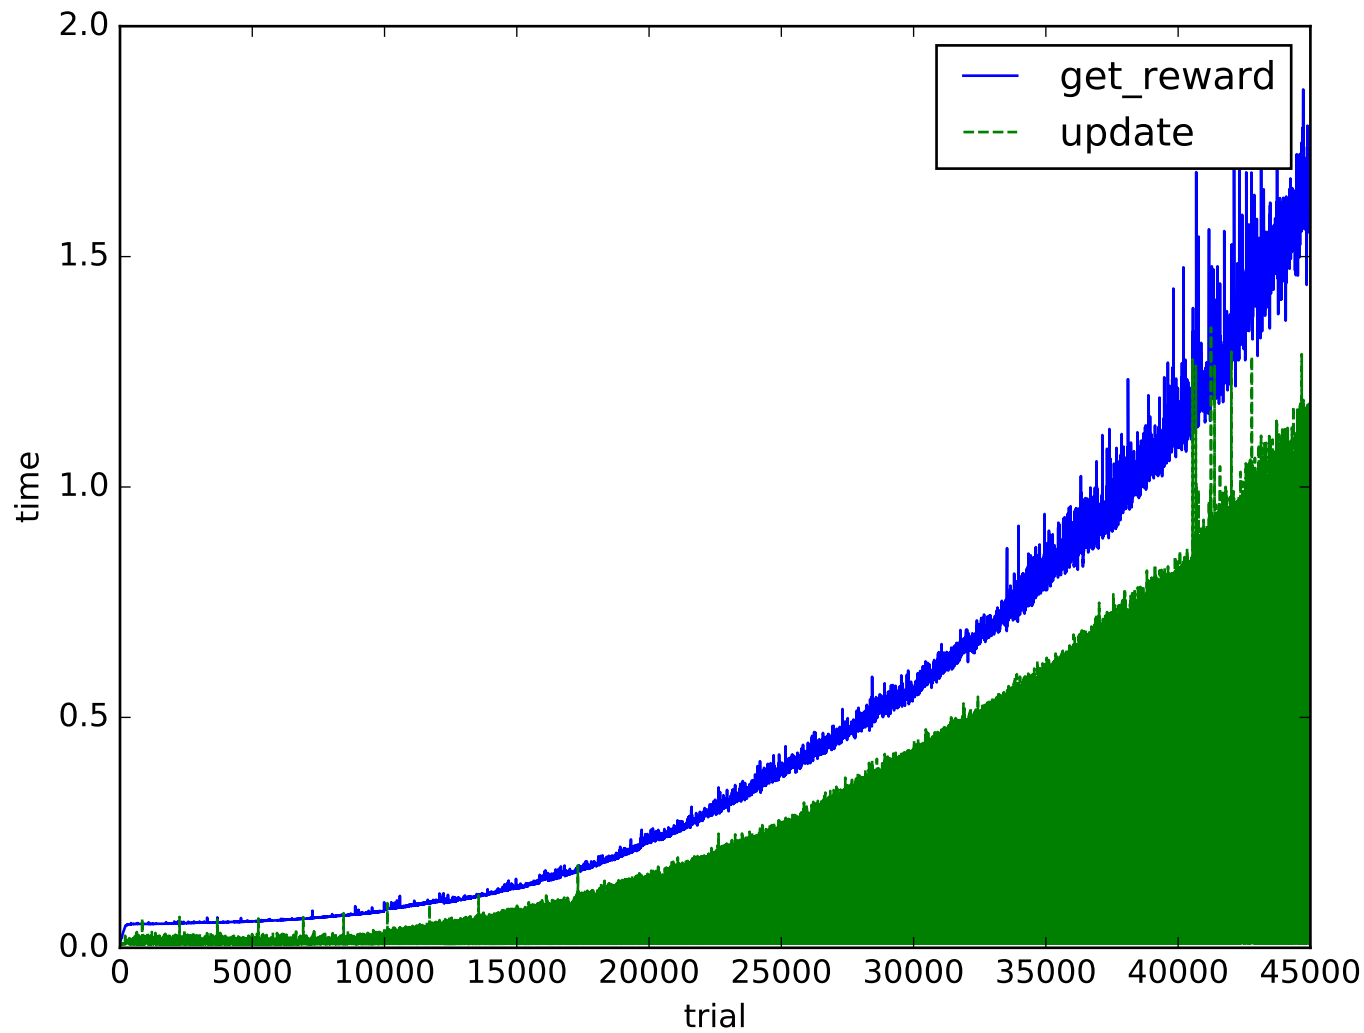

Supplement: Supplementary file [file aceacd5df18526f1d96ee1b9714e95eb-Supplemental.zip]
